# Supplementary material
Source: publisher site journal article supplement (https://www.spandidos-publications.com/1657/downloadSupplementary)

Figure S1. Correlation analysis between GPNMB and CD163 in (A) GSE53733 in GEO and (B) the mRNA microarray dataset in the Chinese Glioma Genome Atlas. GPNMB, glycoprotein non-metastatic melanoma protein B.

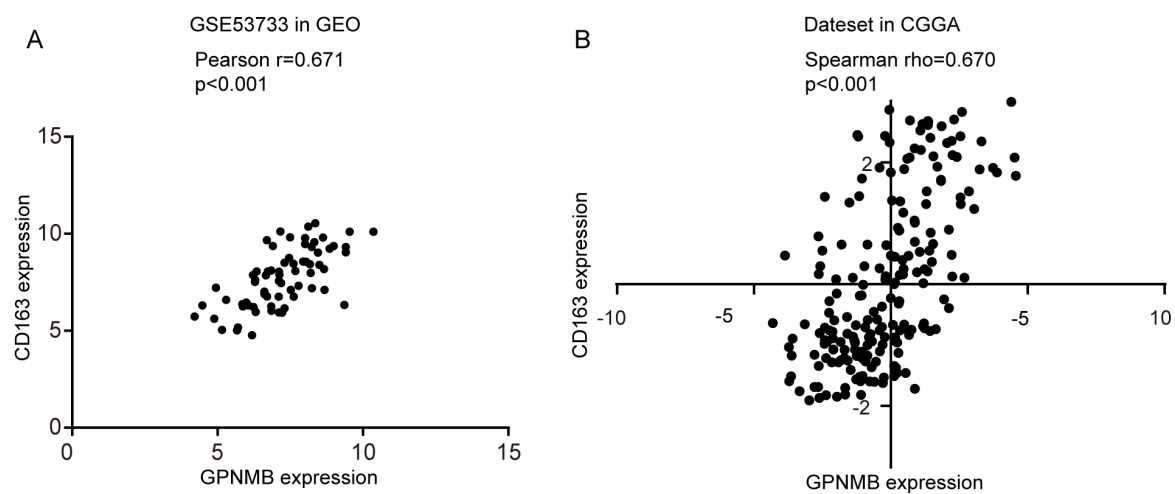

Figure S2. Effects of GPNMB knockdown on U87 cell proliferation, migration and invasion. (A) Western blot analysis confirmed effective knockdown of GPNMB in U87 cells transfected with siRNA against GPNMB compared with those transfected with si-control. (B) The Cell Counting Kit-8 assay demonstrated that knockdown of GPNMB in U87 cells significantly inhibited cell proliferation compared with that in cells transfected with si-control. (C and D) The Transwell (C) migration and (D) invasion assays demonstrated that knockdown of GPNMB in U87 cells reduced cell migration and invasion compared with that in cells transfected with si-control. Scale bar, 100  $\mu$ m. \*\* $P$ <0.01, \*\*\* $P$ <0.001. GPNMB, glycoprotein non-metastatic melanoma protein B; si, small interfering.

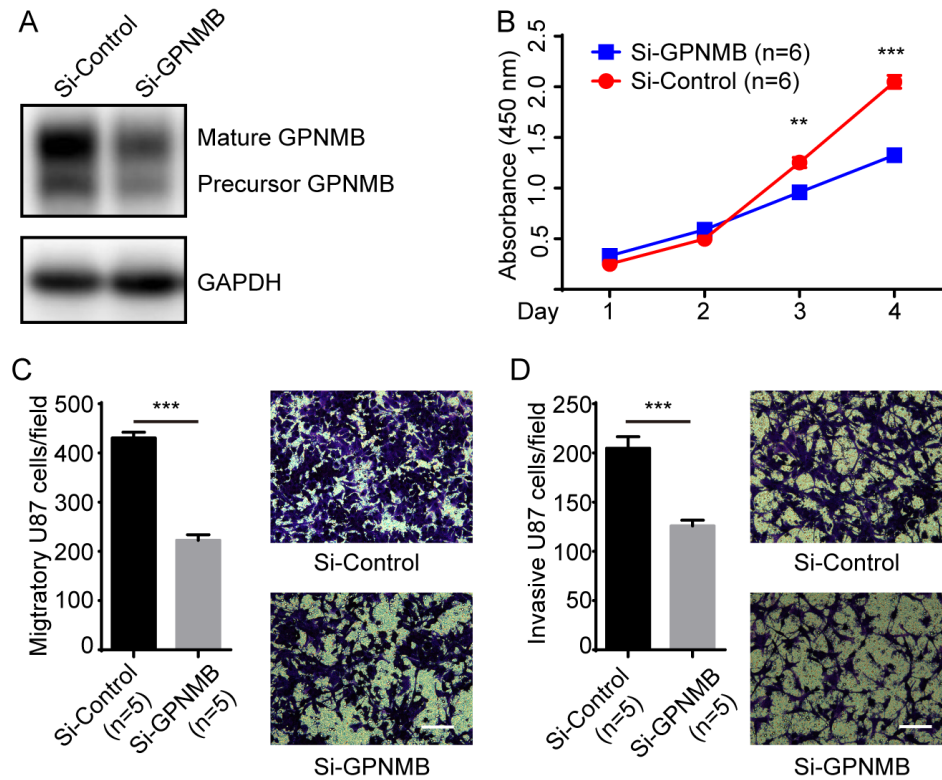

Supplement: Supplementary file 1 [file downloadSupplementary]
